# Supplementary material
Source: PubMed Central journal article supplement (PMC4744518)

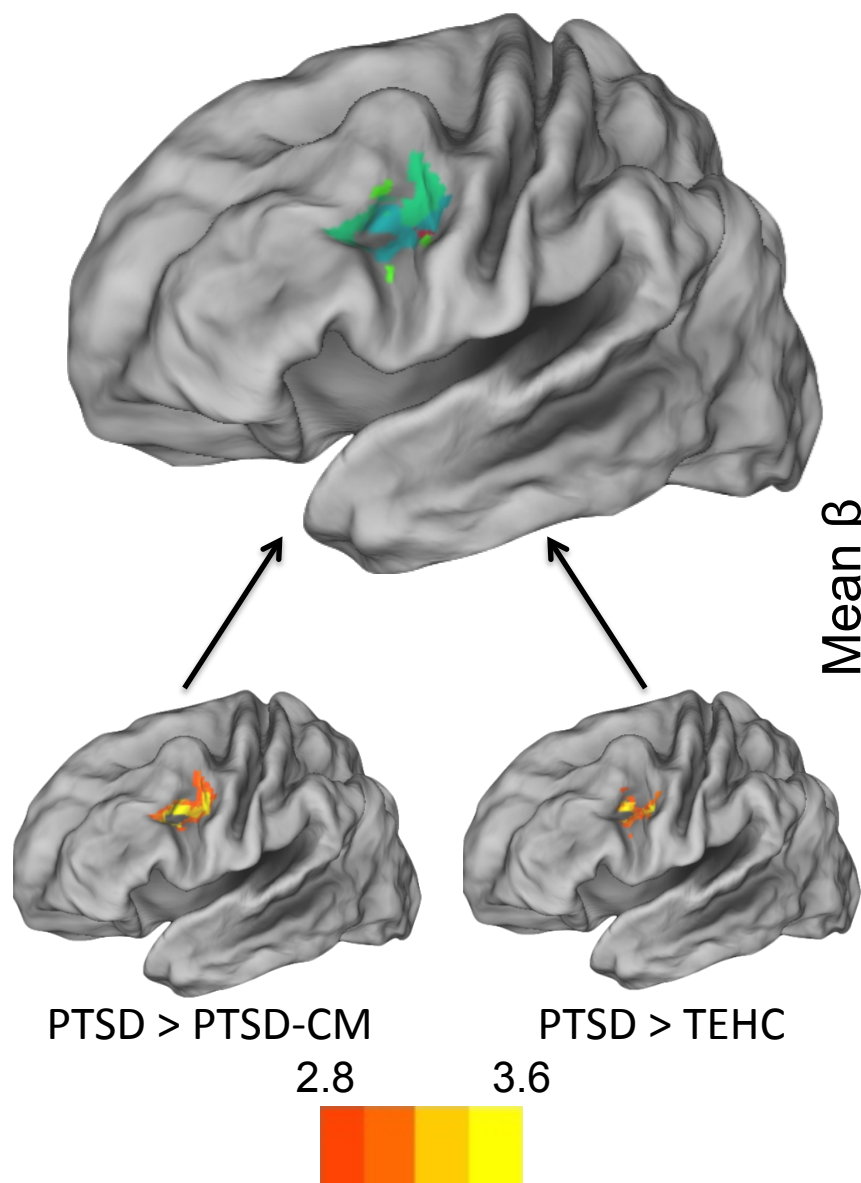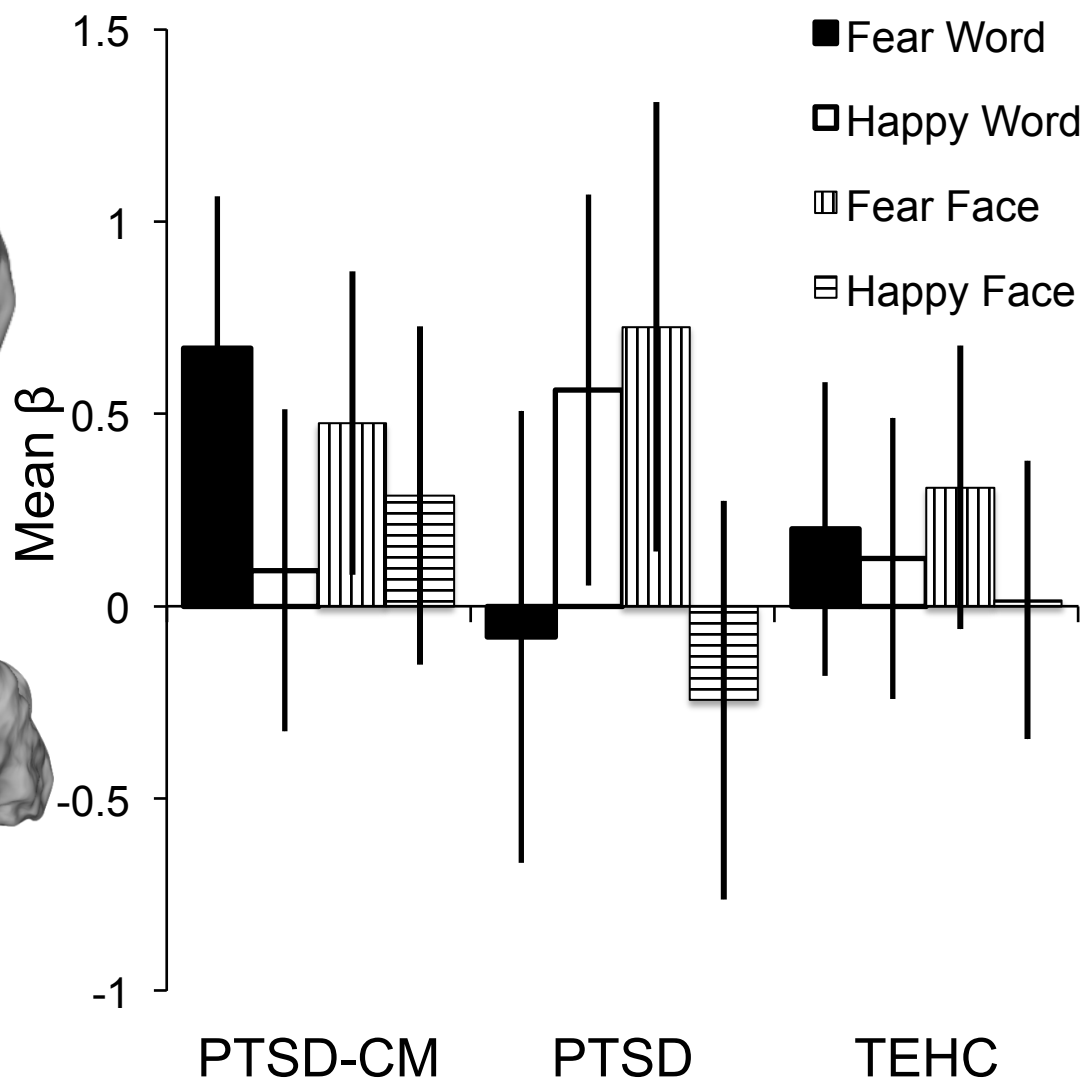

Supplement: NIHMS748424-supplement.pdf [file NIHMS748424-supplement.pdf]
